# Supplementary material for: Strain Rate and Stress Amplitude Effects on the Mechanical Behavior of Carbon Paste Used in the Hall–Héroult Process and Subjected to Cyclic Loadings
Source: MDPI journal article supplement (doi:10.3390/ma15031263), 2022-02-08
Supplement: s1 [file s1]

# Strain Rate and Stress Amplitude Effects on The Mechanical Behavior of Carbon Paste Used in The Hall–Hérout Process and Subjected to Cyclic Loadings

Zahraa Kansoun <sup>1,\*</sup>, Hicham Chaouki <sup>2</sup>, Donald Picard <sup>3</sup>, Julien Lauzon-Gauthier <sup>4</sup>,  
Houshang Alamdari <sup>5</sup> and Mario Fafard <sup>1</sup>

<sup>1</sup> Department of Civil and Water Engineering, NSERC/Alcoa Industrial Research Chair MACE3, Aluminium Research Centre—REGAL, Université Laval, Quebec, QC G1V 0A6, Canada; mario.fafard.2@ulaval.ca

<sup>2</sup> SAFI Quality Software Inc., Quebec, QC G1X 1S7, Canada; hicham.chaouki.1@ulaval.ca

<sup>3</sup> Eddify Technologies Company, Quebec, QC G1P 0B3, Canada; dpicard@eddyfi.com

<sup>4</sup> Continuous Improvement Smelting Technology, Alcoa, Deschambault-Grondines, QC G0A 1S0, Canada; julien.lauzon-gauthier@alcoa.com

<sup>5</sup> Department of Mining, Metallurgical and Materials Engineering, NSERC/Alcoa Industrial Research Chair MACE3, Aluminium Research Centre—REGAL, Université Laval, Quebec, QC G1V 0A6, Canada; houshang.Alamdari@gmn.ulaval.ca

\* Correspondence: zahraa.kansoun.1@ulaval.ca; Tel.: +15816812007

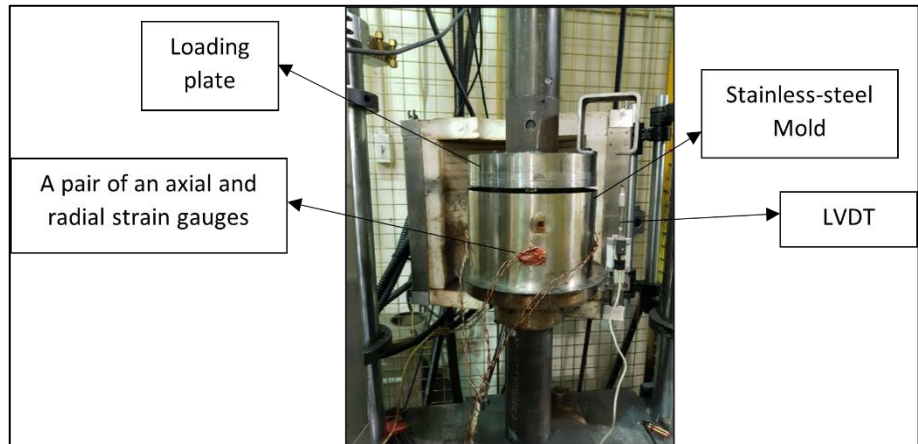

**Figure S1.** Experimental set-up.
